# Supplementary material for: Maternal high-fat diet programs offspring airway hyperinnervation and hyperresponsiveness
Source: JCI journal article supplement (doi:10.1172/jci.insight.181070), 2025-01-08

Offspring Body Weight

Male offspring

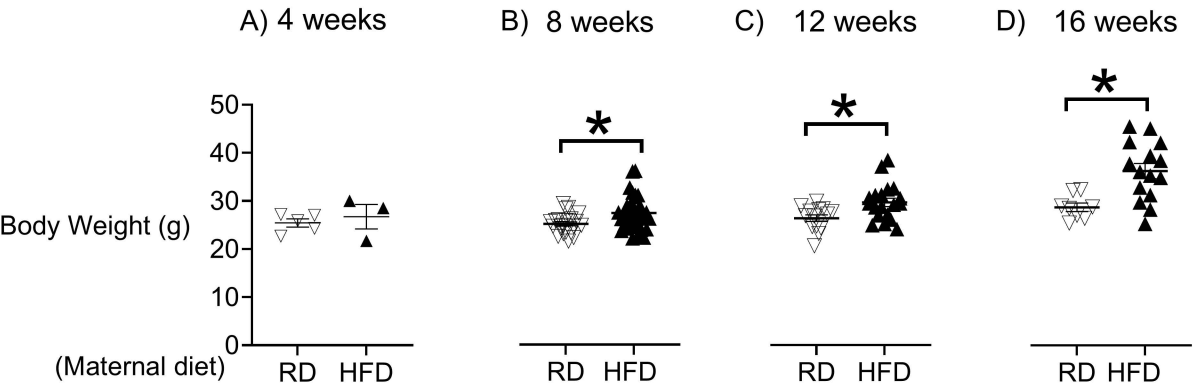

Female offspring

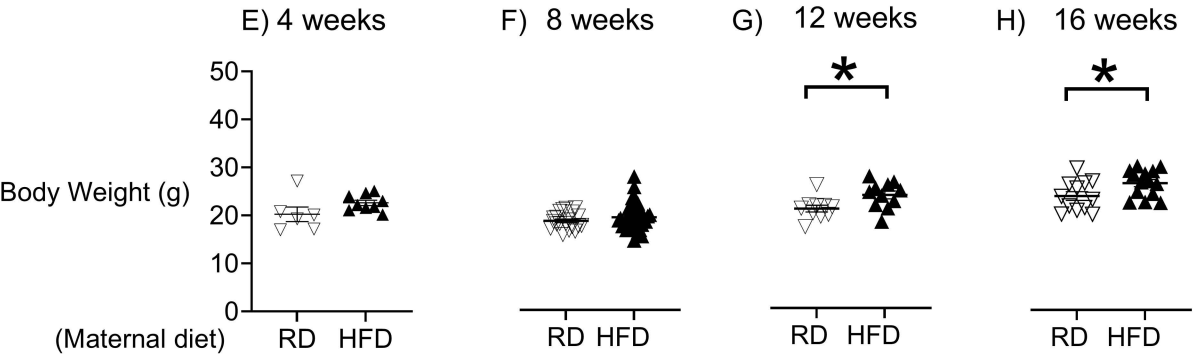

Offspring Body Fat

Male offspring

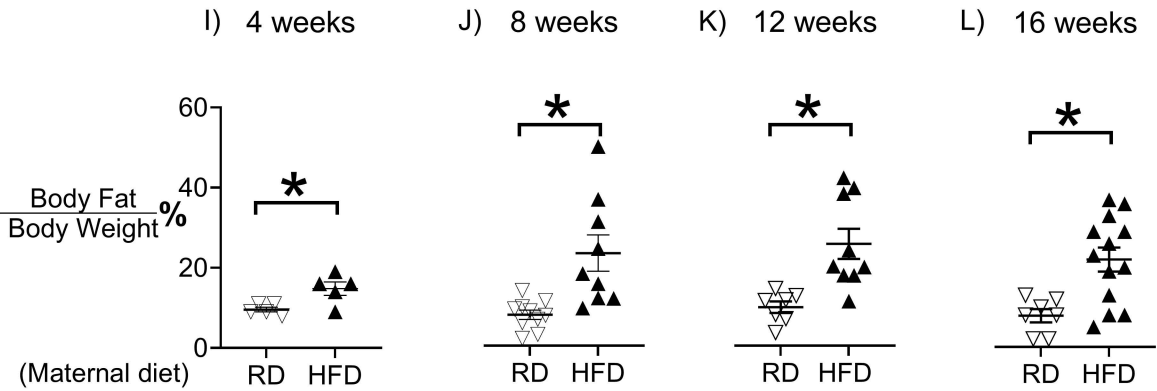

Female offspring

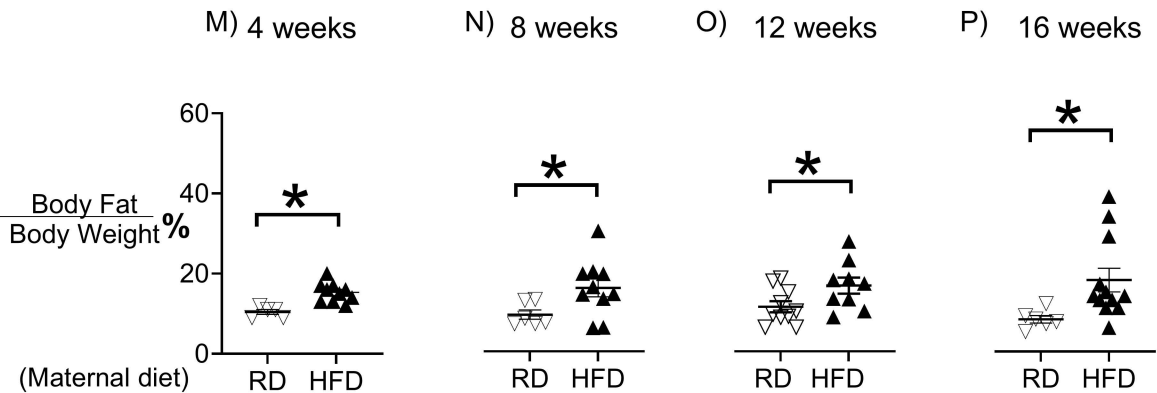

# Airway Physiology

## Atropine

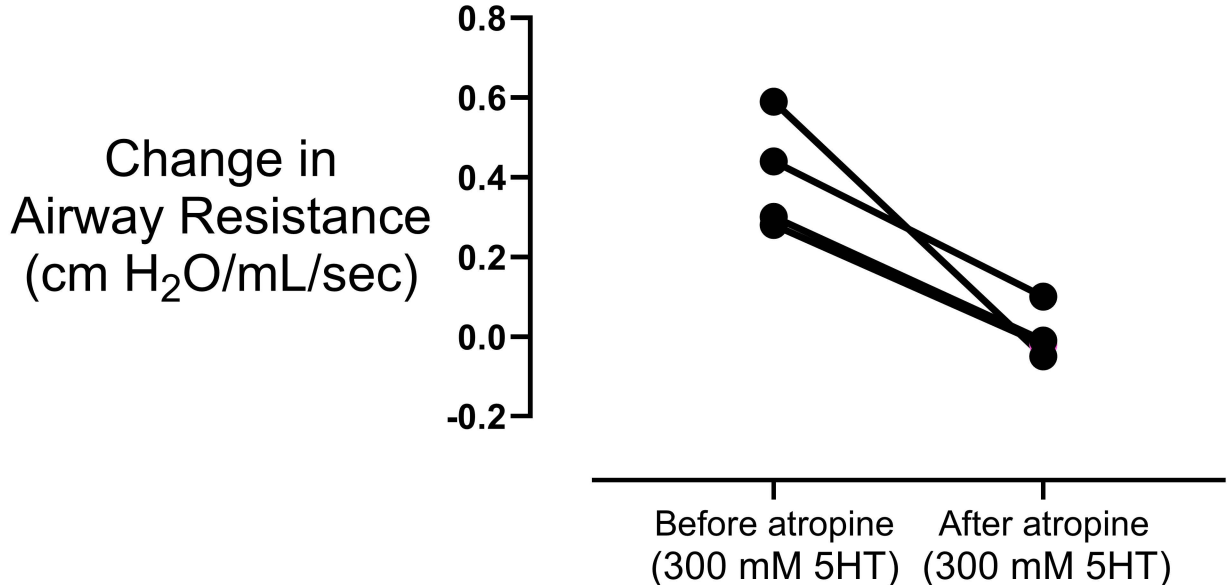

# Offspring Airway Physiology (16 week old offspring)

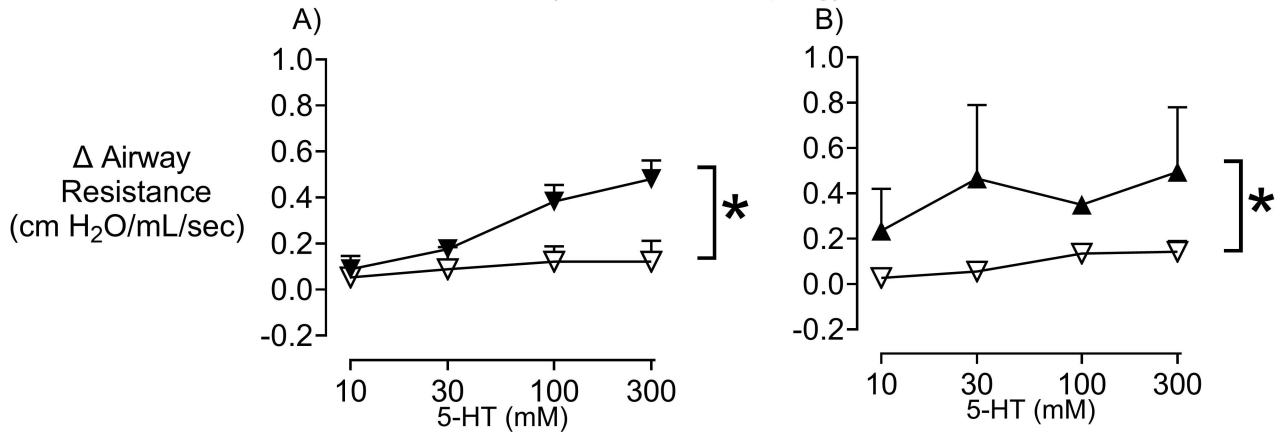

## Nerve length (16 week old offspring)

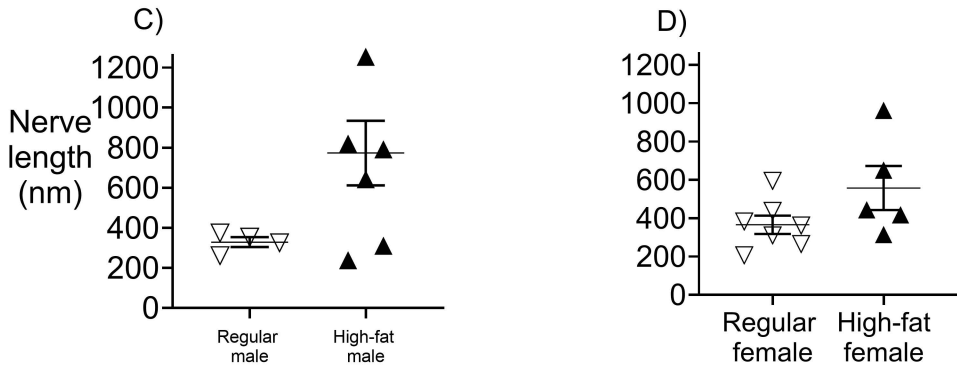

## Nerve branching (16 week old offspring)

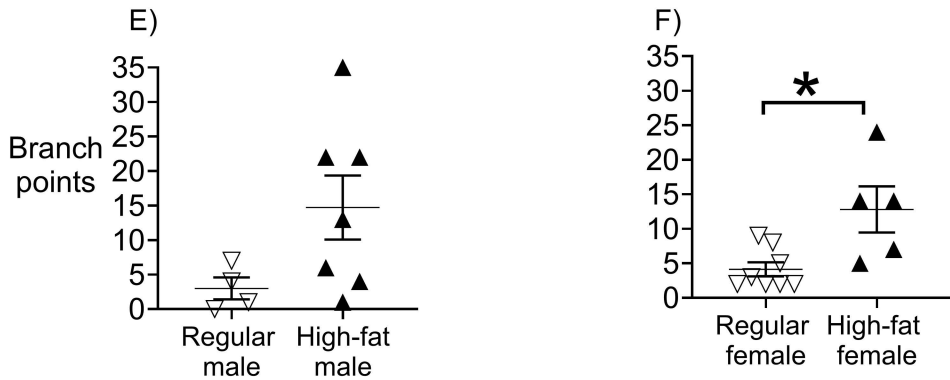

Offspring fasting glucose

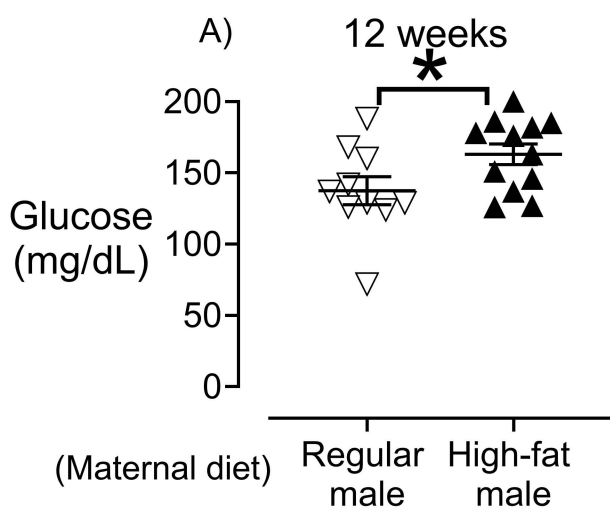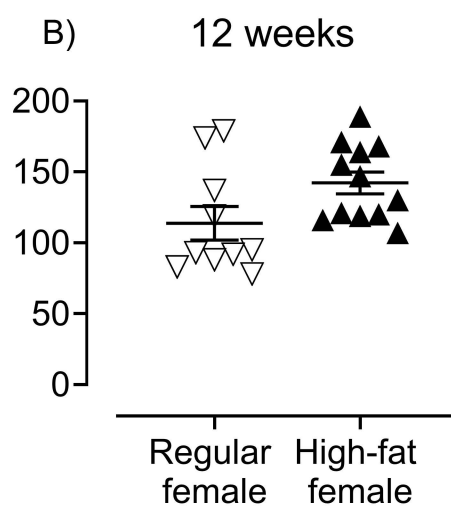

### Offspring fasting glucose

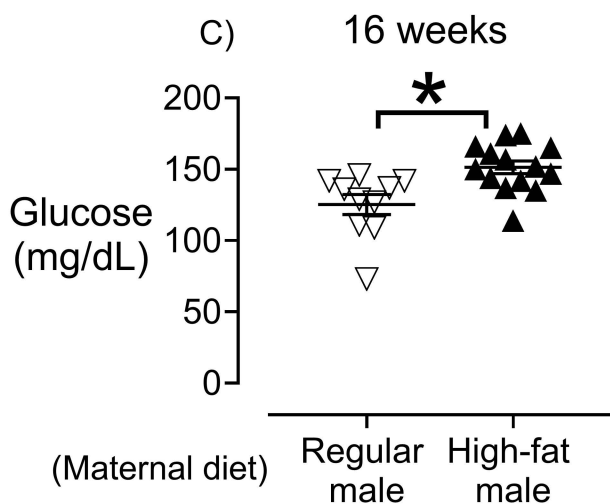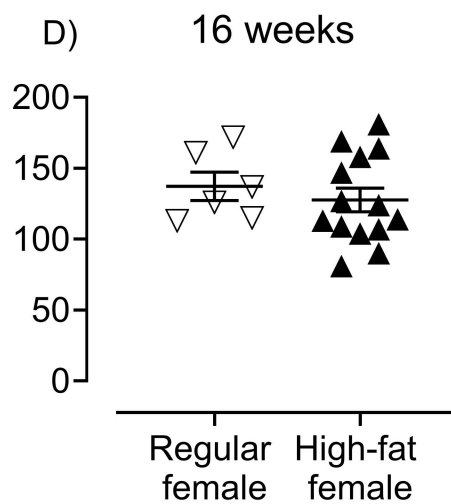

### Offspring fasting insulin

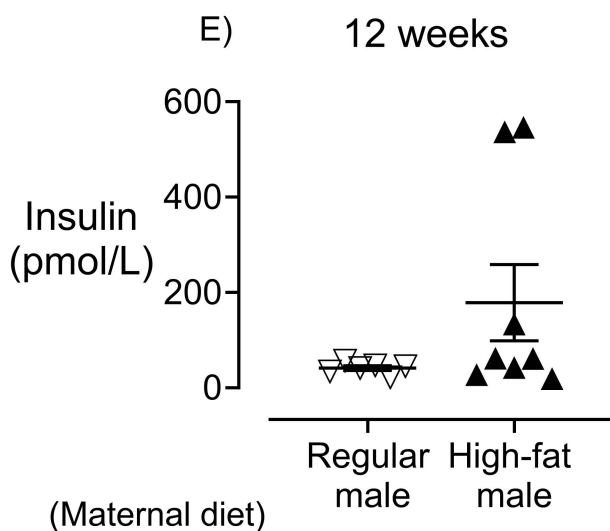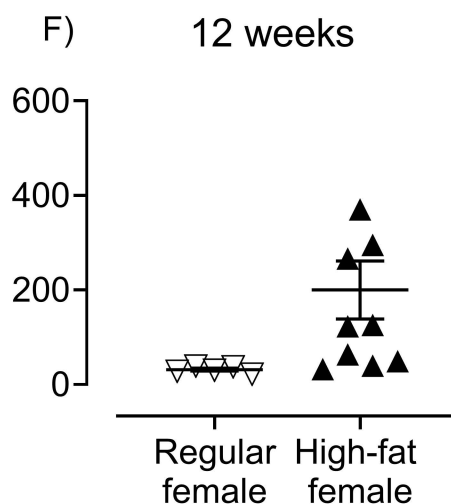

### Offspring fasting insulin

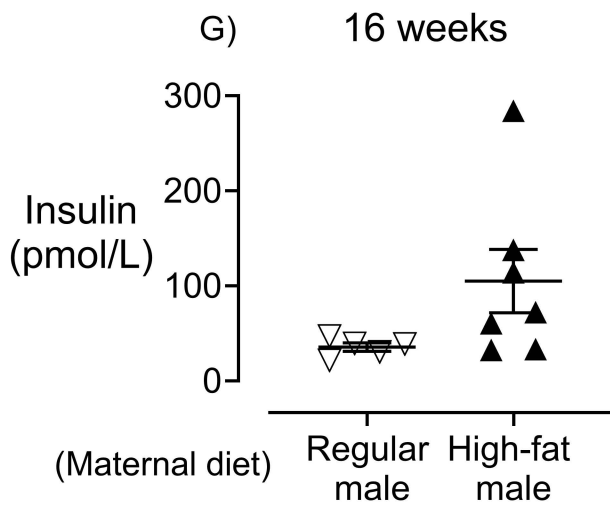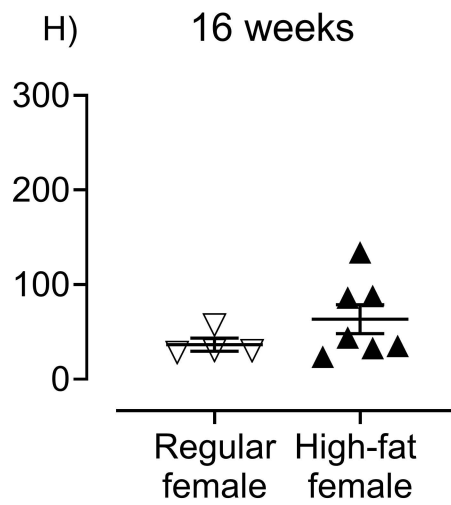

Supplement: sd1 [file 1]
